# Supplementary material for: Loss of FoxA2 accelerates neoplastic changes in the intrahepatic bile duct partly via the MAPK signaling pathway
Source: publisher site journal article supplement (doi:10.18632/aging.102332), 2019-11-05
Supplement: Supplementary file [file aging-v11i21-102332-supplementary-material-SD1.pdf]

SUPPLEMENTARY FIGURE

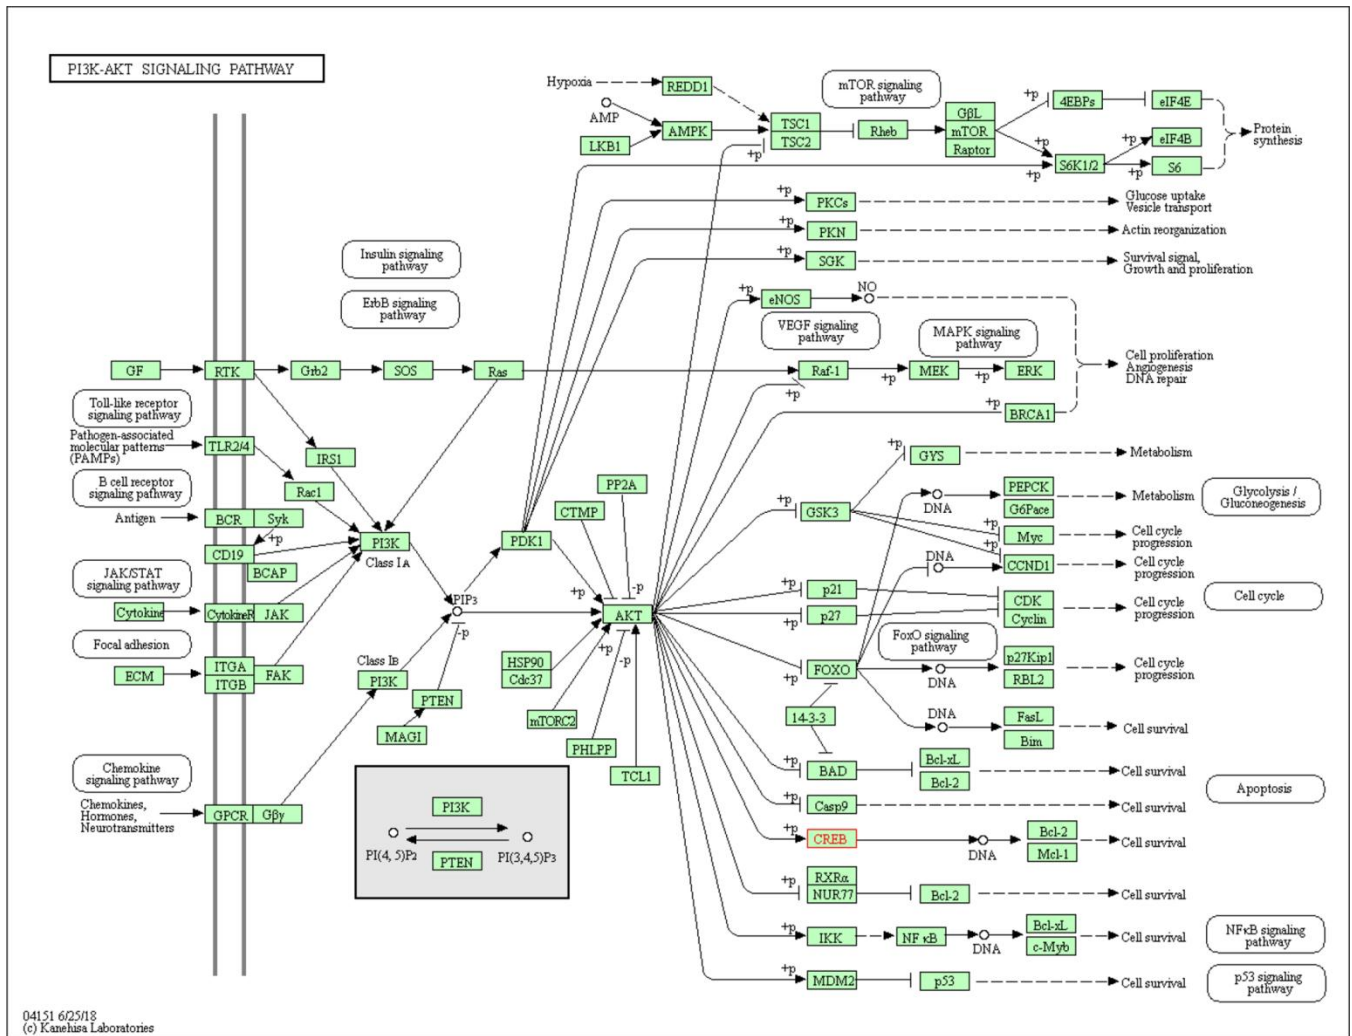

Supplementary Figure 1. AKT signaling pathway from KEGG database. CREB was regulated by activation of AKT.
